# Supplementary material for: Inverse association between Paleolithic Diet Fraction and mortality and incidence of cardiometabolic disease in the prospective Malmö Diet and Cancer Study
Source: Springer Nature journal article supplement (doi:10.1007/s00394-023-03279-6), 2023-12-11
Supplement: MOESM1 [file 26513478]

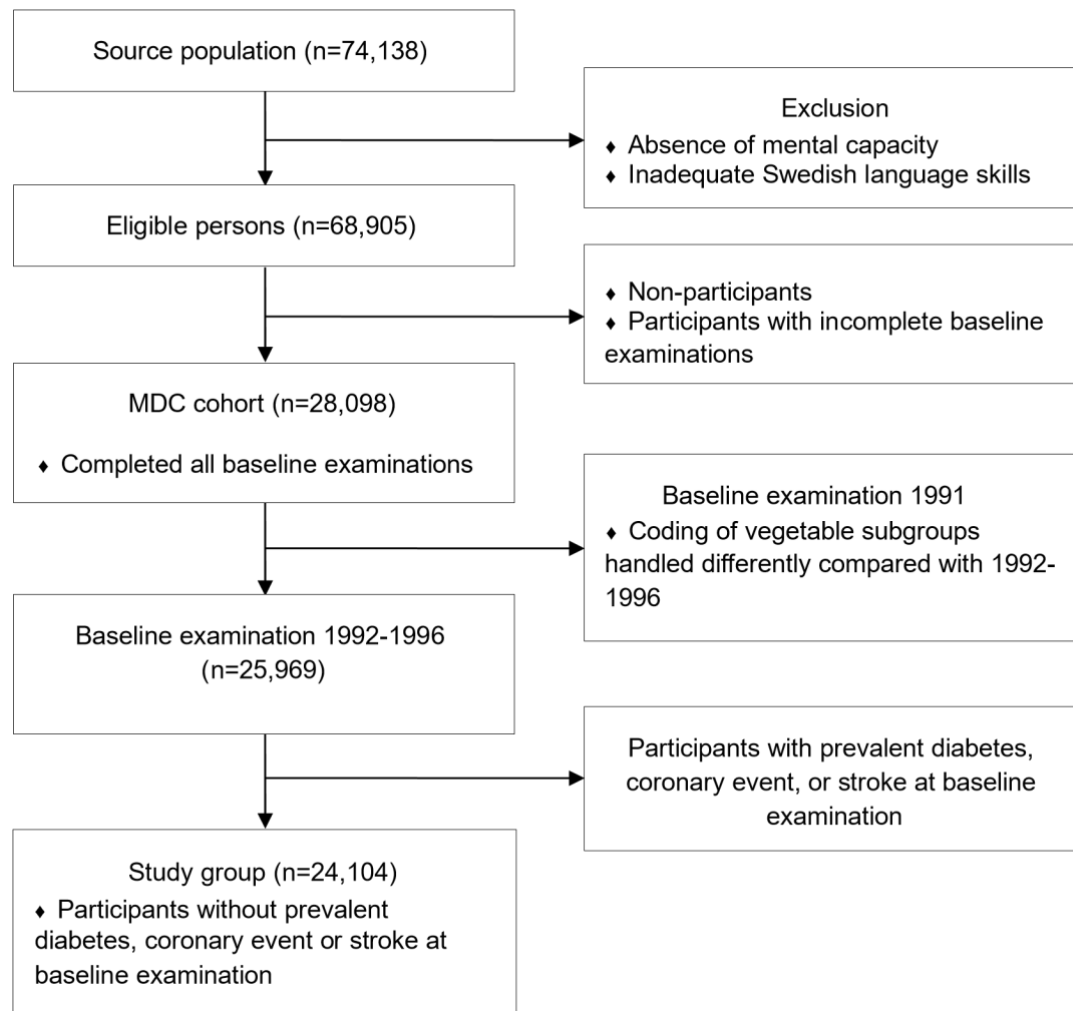

**Supplemental Figure 1.** A flow chart of sample selection from the Malmö diet and Cancer study
