# Supplementary material for: Inverse association between Paleolithic Diet Fraction and mortality and incidence of cardiometabolic disease in the prospective Malmö Diet and Cancer Study
Source: Springer Nature journal article supplement (doi:10.1007/s00394-023-03279-6), 2023-12-11
Supplement: MOESM2 [file 26513478]

## Supplemental Table S1

### *Construction of Paleolithic Diet Fraction*

| Paleolithic Diet Fraction (PDF) calculation                                                                                                                                                          | Paleolithic and non-Paleolithic food groups aggregated from MDCS food groups                                                                                                                                                                                                                                                                                                                                                     | Aggregated MDCS food groups briefly described                                                                                                                                                                                                                                                                                                                                                                                                     | Aggregated MDCS food group variable names (full descriptions in Wirfält E, Sonestedt E (2016) The modified diet history methodology of the Malmö Diet and Cancer cohort)                                                                                                                                                                                                                                                                                                                                                                                                                        |
|------------------------------------------------------------------------------------------------------------------------------------------------------------------------------------------------------|----------------------------------------------------------------------------------------------------------------------------------------------------------------------------------------------------------------------------------------------------------------------------------------------------------------------------------------------------------------------------------------------------------------------------------|---------------------------------------------------------------------------------------------------------------------------------------------------------------------------------------------------------------------------------------------------------------------------------------------------------------------------------------------------------------------------------------------------------------------------------------------------|-------------------------------------------------------------------------------------------------------------------------------------------------------------------------------------------------------------------------------------------------------------------------------------------------------------------------------------------------------------------------------------------------------------------------------------------------------------------------------------------------------------------------------------------------------------------------------------------------|
| PDF was calculated by weight as the fraction of the mean daily summed absolute dietary intake of Paleolithic food groups divided by the mean daily summed absolute dietary intake of all food groups | <p>Paleolithic food groups</p> <ul style="list-style-type: none"> <li>Vegetables</li> <li>Fruits</li> <li>Potatoes</li> <li>Eggs</li> <li>Meat</li> <li>Fish</li> <li>Oil rape seed and olive</li> <li>Nuts</li> <li>Wine</li> </ul> <p>Non-Paleolithic food groups</p> <ul style="list-style-type: none"> <li>Legumes</li> <li>Juice</li> <li>Meat products</li> <li>Milk and milk products</li> <li>Sweet beverages</li> </ul> | <p>Vegetables (not legumes)</p> <p>Fruits, berries</p> <p>Potatoes</p> <p>Eggs</p> <p>Pork, beef, lamb, game meat, poultry, pure offal</p> <p>Fish, shellfish, molluscs</p> <p>Rape seed and olive oil</p> <p>Nuts, seeds, almond paste</p> <p>Wine</p> <p>Legumes</p> <p>Juice from vegetables and fruits</p> <p>Offal as a mixed product or spread, sausage</p> <p>Milk, cream, cheese, butter, milk fat-based margarine</p> <p>Soft drinks</p> | <p>g2vegthf-glegumh-glegumf</p> <p>g2ncitrtrt+g2citrtr</p> <p>gpotboil+gpotrec+gpotfri+gpotdfri</p> <p>geggt</p> <p>gporklf+gporkmf+gporkhf+gporks+gbeeflf+gbeefhf+gbeefs+gl</p> <p>amblf+glambhf+ggamet+gpoultry</p> <p>gfishlf+gfishhf+gfishm+gfi Helf+gfihehf+gfishs+gshellft</p> <p>goil2+goil4</p> <p>gnuts</p> <p>gwine</p> <p>glegumh+glegumf</p> <p>gcarrju+gveju+gcitrju+gncitrju</p> <p>goffalm+goffal+goffals+gsaust+gsauss</p> <p>gmilklf+gmilkmf+gmilkhf+gmilkylf+gmilkyhf+gcreamlf+gcreammf+gcreamhf+gcheeslf+gcheesmf+gcheeshf+gbut</p> <p>ter+gmargd1+gmargd2</p> <p>gsofdr</p> |

|                         |                                                                                                                |                                                                                                                                                           |
|-------------------------|----------------------------------------------------------------------------------------------------------------|-----------------------------------------------------------------------------------------------------------------------------------------------------------|
| Cereal grains with rice | Cereal grains, rice                                                                                            | gcelfin+gcelfls+gcelfhs+gcehfn+gcehfls+gcehfhs+gflour+gbrel<br>fi+gbremfi+gbrehfi+gbrexhfi+gcrbrlfi+gcrbrmfi+gcrbrhfi+gbir<br>ulei+gbiruhfi+gripat+ggruel |
| Fat oil and margarine   | Oil (not rape seed and olive),<br>margarine (not milk fat-based),<br>mayonnaise/dressing                       | goil1+goil3+gmarghf1+gmarghf2+gmarghf3+gmarghf4+gmarg<br>hf5+gmargmf+gmarglf1+gmarglf2+gmarglf3+gmarglf4+gdress<br>lf+gdressmf+gdresshf                   |
| Bakery sweets           | Cakes, sugar, sweets, chocolate,<br>snacks, chips, ice cream                                                   | gcakeslf+gcakeshf+gsugar+gsweet+gchoc+gsnacks+gicecrlf+gi<br>cecrhf                                                                                       |
| Jam                     | Marmelade, honey, jam, puree                                                                                   | gmarm                                                                                                                                                     |
| Sauce soups             | Ketchup, sauces, soups                                                                                         | gketchup+ginsoup+gpowder                                                                                                                                  |
| Beer                    | Beer, cider                                                                                                    | gbeer                                                                                                                                                     |
| Spirits                 | Liquor                                                                                                         | gspirits                                                                                                                                                  |
| Remainder miscellaneous | Vinegar, spices, soya products,<br>algae, seaweed meal, nutritional<br>powder and remainder<br>(miscellaneous) | gspice+gsoya+gformula+ggarb                                                                                                                               |

---

*Note.* Paleolithic and non-paleolithic food groups aggregated from Malmö Diet and Cancer Study (MDCS) food groups. Non-energy containing beverages excluded. Paleolithic and non-Paleolithic food group names consistent with previous publications on PDF.
