# Supplementary material for: Inverse association between Paleolithic Diet Fraction and mortality and incidence of cardiometabolic disease in the prospective Malmö Diet and Cancer Study
Source: Springer Nature journal article supplement (doi:10.1007/s00394-023-03279-6), 2023-12-11
Supplement: MOESM3 [file 26513478]

Supplemental Table S2

## Median Daily Micronutrient Intake at Baseline

| Variable                                                              | (IQR, Min-Max)         | Quintile of PDF |      |      |      |      | $P^a$ | $r_s$ | $P^{ab}$ | $r_s^b$ |
|-----------------------------------------------------------------------|------------------------|-----------------|------|------|------|------|-------|-------|----------|---------|
|                                                                       |                        | 1               | 2    | 3    | 4    | 5    |       |       |          |         |
| Protein                                                               |                        |                 |      |      |      |      |       |       |          |         |
| g                                                                     | 80 (28, 17-264)        | 86              | 83   | 82   | 78   | 73   | <.001 | -0.21 |          |         |
| MJ                                                                    | 1.3 (0.5, 0.3-4.4)     | 1.4             | 1.4  | 1.4  | 1.3  | 1.2  | <.001 | -0.21 |          |         |
| E%                                                                    | 15 (3, 6-29)           | 14              | 14   | 15   | 15   | 15   | <.001 | 0.19  |          |         |
| Fat                                                                   |                        |                 |      |      |      |      |       |       |          |         |
| g                                                                     | 89 (42, 9-479)         | 102             | 96   | 91   | 84   | 76   | <.001 | -0.28 |          |         |
| MJ                                                                    | 3.3 (1.6, 0.3-18.0)    | 3.8             | 3.6  | 3.4  | 3.2  | 2.9  | <.001 | -0.28 |          |         |
| E%                                                                    | 37 (8, 4-70)           | 38              | 38   | 37   | 37   | 36   | <.001 | -0.08 |          |         |
| Carbohydrates                                                         |                        |                 |      |      |      |      |       |       |          |         |
| g                                                                     | 232 (91, 33-966)       | 267             | 248  | 235  | 219  | 197  | <.001 | -0.35 |          |         |
| MJ                                                                    | 3.9 (1.5, 0.6-16.2)    | 4.5             | 4.1  | 3.9  | 3.7  | 3.3  | <.001 | -0.35 |          |         |
| E%                                                                    | 43 (8, 16-76)          | 44              | 43   | 43   | 43   | 42   | <.001 | -0.10 |          |         |
| Fibre                                                                 |                        |                 |      |      |      |      |       |       |          |         |
| g                                                                     | 19 (8, 3-119)          | 17              | 18   | 19   | 19   | 20   | <.001 | 0.11  |          |         |
| MJ                                                                    | 0.2 (0.1, 0.0-1.0)     | 0.1             | 0.2  | 0.2  | 0.2  | 0.2  | <.001 | 0.11  |          |         |
| E%                                                                    | 1.7 (0.6, 0.4-6.7)     | 1.4             | 1.6  | 1.7  | 1.8  | 2.1  | <.001 | 0.44  |          |         |
| Alcohol                                                               |                        |                 |      |      |      |      |       |       |          |         |
| g                                                                     | 7 (14, 0-176)          | 6               | 7    | 7    | 8    | 9    | <.001 | 0.07  |          |         |
| MJ                                                                    | 0.2 (0.4, 0.0-5.2)     | 0.2             | 0.2  | 0.2  | 0.2  | 0.3  | <.001 | 0.07  |          |         |
| E%                                                                    | 2 (4, 0-42)            | 2               | 2    | 2    | 3    | 3    | <.001 | 0.13  |          |         |
| Retinol, mg                                                           | 1.0 (0.8, 0.0-38.7)    | 1.2             | 1.1  | 1.0  | 0.9  | 0.7  | <.001 | -0.27 | <.001    | -0.14   |
| Beta-carotene, mg                                                     | 2.6 (2.9, 0.0-71.0)    | 1.8             | 2.3  | 2.7  | 2.9  | 3.5  | <.001 | 0.27  | <.001    | 0.39    |
| Retinol equivalents, mg                                               | 1.5 (1.1, 0.1-39.3)    | 1.6             | 1.6  | 1.5  | 1.5  | 1.5  | <.001 | -0.06 | <.001    | 0.12    |
| Vitamin D, ug                                                         | 6.8 (3.9, 0.3-39.8)    | 7.5             | 7.1  | 7.0  | 6.5  | 5.9  | <.001 | -0.19 | .049     | 0.01    |
| Vitamin E, mg                                                         | 9.5 (4.2, 0.9-66.4)    | 9.3             | 9.6  | 9.8  | 9.5  | 9.6  | <.001 | 0.03  | <.001    | 0.33    |
| D-alpha-tocopherol, mg                                                | 8.5 (3.7, 0.9-64.9)    | 8.2             | 8.5  | 8.7  | 8.5  | 8.7  | <.001 | 0.05  | <.001    | 0.37    |
| Ascorbic acid, mg                                                     | 94 (73, 0-883)         | 79              | 86   | 94   | 97   | 108  | <.001 | 0.18  | <.001    | 0.37    |
| Thiamin, mg                                                           | 1.3 (0.5, 0.3-4.7)     | 1.4             | 1.4  | 1.3  | 1.2  | 1.1  | <.001 | -0.29 | .1       | -0.01   |
| Riboflavin, mg                                                        | 1.8 (0.7, 0.2-8.8)     | 2.1             | 1.9  | 1.8  | 1.7  | 1.5  | <.001 | -0.32 | <.001    | -0.11   |
| Folate, ug                                                            | 230 (94, 32-1086)      | 229             | 231  | 231  | 229  | 229  | .3    | -0.01 | <.001    | 0.36    |
| Niacin, mg                                                            | 17 (6, 5-62)           | 17              | 17   | 17   | 17   | 17   | <.001 | -0.03 | <.001    | 0.33    |
| Niacin equivalents, mg                                                | 34 (12, 8-122)         | 35              | 35   | 34   | 33   | 32   | <.001 | -0.12 | <.001    | 0.27    |
| B6 (Pyridoxine), mg                                                   | 1.9 (0.7, 0.4-11.5)    | 1.8             | 1.9  | 1.9  | 1.9  | 1.9  | <.001 | 0.03  | <.001    | 0.50    |
| B12 (Cobalamin), mg                                                   | 5.4 (3.3, 0.1-120.7)   | 5.8             | 5.5  | 5.5  | 5.2  | 4.9  | <.001 | -0.13 | <.001    | 0.07    |
| Calcium, mg                                                           | 1070 (500, 78-5227)    | 1281            | 1155 | 1090 | 998  | 878  | <.001 | -0.36 | <.001    | -0.17   |
| Phosphorus, mg                                                        | 1470 (552, 191-4517)   | 1660            | 1552 | 1497 | 1405 | 1274 | <.001 | -0.31 | <.001    | -0.03   |
| Iron, mg                                                              | 14 (6, 3-64)           | 16              | 15   | 15   | 14   | 13   | <.001 | -0.18 | <.001    | 0.11    |
| Magnesium, mg                                                         | 331 (111, 82-1304)     | 354             | 339  | 335  | 323  | 307  | <.001 | -0.18 | <.001    | 0.26    |
| Sodium, mg                                                            | 3160 (1217, 644-17638) | 3337            | 3258 | 3216 | 3079 | 2926 | <.001 | -0.16 | <.001    | 0.17    |
| Potassium, mg                                                         | 3244 (1075, 798-12590) | 3250            | 3233 | 3284 | 3235 | 3215 | .1    | -0.01 | <.001    | 0.58    |
| Zinc, mg                                                              | 11 (4, 2-35)           | 11              | 11   | 11   | 10   | 10   | <.001 | -0.20 | <.001    | 0.13    |
| Selenium, ug                                                          | 35 (16, 6-150)         | 35              | 35   | 36   | 35   | 35   | .5    | 0.00  | <.001    | 0.31    |
| Saturated fat (SFA), g                                                | 38 (20, 2-178)         | 45              | 41   | 38   | 35   | 31   | <.001 | -0.31 | <.001    | -0.10   |
| Monounsaturated fat (MUFA), g                                         | 31 (14, 1-192)         | 35              | 33   | 32   | 29   | 27   | <.001 | -0.26 | .2       | -0.01   |
| Polyunsaturated fat (PUFA), g                                         | 14 (7, 2-81)           | 15              | 15   | 14   | 13   | 12   | <.001 | -0.18 | <.001    | 0.05    |
| Cholesterol, g                                                        | 0.33 (0.17, 0.00-1.73) | 0.35            | 0.34 | 0.34 | 0.33 | 0.31 | <.001 | -0.09 | <.001    | 0.16    |
| Monosaccharides, g                                                    | 36 (20, 2-275)         | 36              | 36   | 37   | 37   | 36   | .01   | 0.02  | <.001    | 0.26    |
| Disaccharides, g                                                      | 65 (37, 3-462)         | 87              | 73   | 66   | 58   | 47   | <.001 | -0.48 | <.001    | -0.39   |
| Sucrose, g                                                            | 42 (29, 1-400)         | 54              | 46   | 42   | 39   | 33   | <.001 | -0.32 | <.001    | -0.18   |
| Butyric acid, Caproic acid, Caprylic acid, Capric acid, C4:0-C10:0, g | 3.2 (2.6, 0.0-26.2)    | 4.0             | 3.5  | 3.2  | 2.9  | 2.5  | <.001 | -0.27 | <.001    | -0.14   |
| Lauric acid, C12:0, g                                                 | 2.2 (1.4, 0.0-12.7)    | 2.7             | 2.5  | 2.3  | 2.1  | 1.7  | <.001 | -0.32 | <.001    | -0.15   |
| Myristic acid, C14:0, g                                               | 4.0 (3, 0-25)          | 4.9             | 4.4  | 4.1  | 3.7  | 3.3  | <.001 | -0.29 | <.001    | -0.12   |
| Palmitic acid, C16:0, g                                               | 18 (9, 1-89)           | 21              | 20   | 18   | 17   | 15   | <.001 | -0.29 | <.001    | -0.07   |
| Stearic acid, C18:0, g                                                | 8.4 (4.2, 0.2-51.8)    | 9.7             | 9.1  | 8.6  | 7.9  | 7.0  | <.001 | -0.31 | <.001    | -0.08   |
| Arachidic acid, C20:0, g                                              | 0.38 (0.19, 0.00-2.14) | 0.42            | 0.40 | 0.39 | 0.36 | 0.32 | <.001 | -0.22 | .7       | 0.00    |
| Palmitoleic acid, C16:1, g                                            | 1.8 (0.8, 0.1-9.6)     | 1.9             | 1.8  | 1.8  | 1.7  | 1.6  | <.001 | -0.21 | <.001    | 0.03    |
| Oleic acid, C18:1, g                                                  | 28 (13, 1-177)         | 31              | 30   | 28   | 26   | 24   | <.001 | -0.26 | .01      | -0.02   |
| Alpha-linolenic acid (n-3), gamma-linolenic acid (n-6), C18:3, g      | 1.7 (0.9, 0.2-11.8)    | 1.9             | 1.8  | 1.7  | 1.6  | 1.4  | <.001 | -0.22 | .4       | -0.01   |
| Arachidonic acid (n-6), C20:4, g                                      | 0.14 (0.08, 0.00-1.09) | 0.14            | 0.14 | 0.15 | 0.14 | 0.14 | <.001 | -0.05 | <.001    | 0.18    |
| Linoleic acid (n-6), C18:2, g                                         | 11 (6, 1-70)           | 12              | 12   | 11   | 10   | 9    | <.001 | -0.19 | <.001    | 0.02    |
| Eicosapentaenoic acid (n-3), C20:5, g                                 | 0.12 (0.17, 0.00-2.67) | 0.08            | 0.11 | 0.12 | 0.13 | 0.14 | <.001 | 0.14  | <.001    | 0.23    |
| Docosapentaenoic acid (n-3), C22:5, g                                 | 0.06 (0.05, 0.00-0.81) | 0.06            | 0.06 | 0.06 | 0.06 | 0.06 | <.001 | 0.04  | <.001    | 0.20    |
| Docosahexaenoic acid (n-3), C22:6, g                                  | 0.25 (0.31, 0.00-4.41) | 0.21            | 0.24 | 0.25 | 0.26 | 0.28 | <.001 | 0.11  | <.001    | 0.22    |

Note. Participants without prevalent coronary event, stroke or diabetes at baseline examination 1992-1996 (N = 24,104) from the Malmö Diet and Cancer Study. PDF = Paleolithic Diet Fraction.

<sup>a</sup> Spearman rank test with quintile of PDF as predictor. <sup>b</sup> Relative to total food group weight.
